# Supplementary figures and images for: MiR-106a-5p by Targeting MAP3K2 Promotes Repair of Oxidative Stress Damage to the Intestinal Barrier in Prelaying Ducks
Source: MDPI journal article supplement (doi:10.3390/ani14071037), 2024-03-28

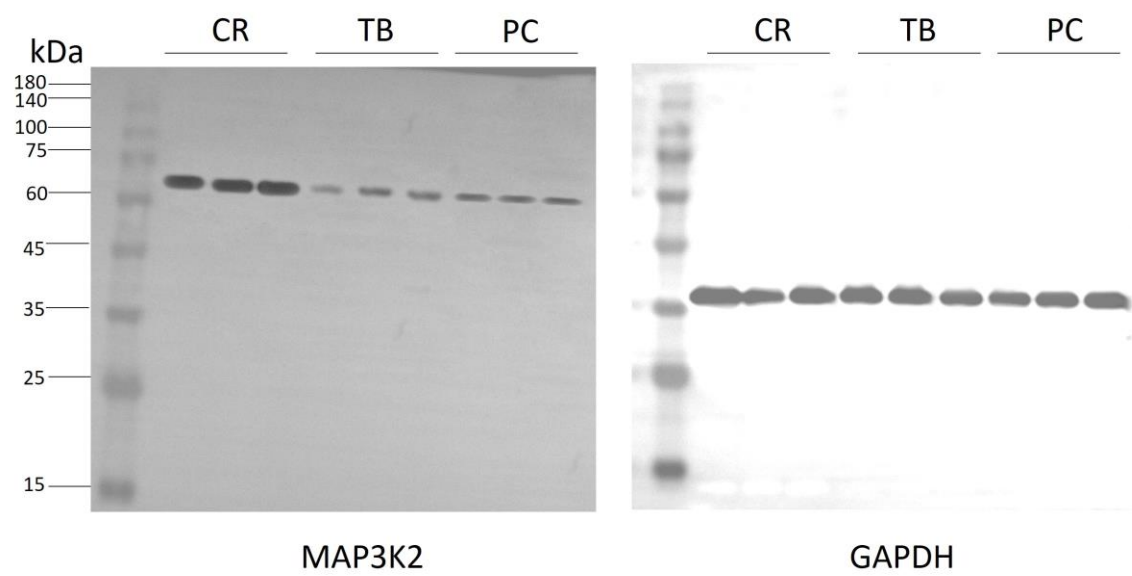

Figure S1: Original Western Blot figure of Figure 8(C).

Supplement: s1 [file s1]
